# Supplementary material for: The Hindu Kush–Karakorum and linguistic areality
Source: publisher site journal article supplement (doi:10.1515/jsall-2021-2027), 2020-09-01
Supplement: Supplementary file 1 [file j_jsall-2021-2027_suppl.docx]

The Hindu Kush-Karakorum and linguistic areality: Appendix

**Table 1: Language sample.**

| ***Genus*** | ***Variety*** | ***Project code*** | ***ISO 639-3*** | ***Glottocode*** | ***Location*** | ***Longitude*** | ***Latitude*** |
| --- | --- | --- | --- | --- | --- | --- | --- |
| Burushaski | Burushaski Hunza | bsk(h) | bsk | hunz1248 | Hunza, Gilgit, Gilgit-Baltistan, Pakistan | 74.59822 | 36.31293 |
|  | Burushaski Nagar | bsk(n) | bsk | naga1398 | Nagar, Gilgit, Gilgit-Baltistan, Pakistan | 74.36720 | 36.23990 |
| Indo-Aryan | Bateri | btv | btv | bate1261 | Palas, Lower Kohistan, Hazara, Khyber Pakhtunkhwa, Pakistan | 72.92674 | 34.95820 |
|  | Brokskat | bkk | bkk | brok1247 | Batalik, Kargil, Ladakh, Jammu & Kashmir, India | 76.43277 | 34.63458 |
|  | Dameli | dml | dml | dame1241 | Damel, Chitral, Malakand, Khyber Pakhtunkhwa, Pakistan | 71.68785 | 35.37663 |
|  | Gawarbati (Afg) | gwt(a) | gwt | gawa1247 | Naray, Kunar, Afghanistan | 71.52251 | 35.22136 |
|  | Gawarbati (Pak) | gwt(p) | gwt | gawa1247 | Arandu, Chitral, Malakand, Khyber Pakhtunkhwa, Pakistan | 71.54742 | 35.31012 |
|  | Gawri | gwc | gwc | kala1374 | Kalam, Swat, Malakand, Khyber Pakhtunkhwa, Pakistan | 72.59606 | 35.48367 |
|  | Gojri (Afg) | gju(a) | gju | west2375 | Naray, Kunar, Afghanistan | 71.47042 | 35.14361 |
|  | Gojri (Pak) | gju(p) | gju | east2311 | Dawanan, Neelum, Azad Jammu & Kashmir, Pakistan | 73.99123 | 34.73142 |
|  | Hindko | hno | hno | nort2662 | Mansehra, Hazara, Khyber Pakhtunkhwa, Pakistan | 73.19852 | 34.23857 |
|  | Indus Kohistani | mvy | mvy | indu1242 | Seo, Dassu, Upper Kohistan, Hazara, Khyber Pakhtunkhwa, Pakistan | 73.18961 | 35.29917 |
|  | Kalasha | kls | kls | nort2663 | Bumburet, Chitral, Malakand, Khyber Pakhtunkhwa, Pakistan | 71.70143 | 35.70835 |
|  | Kalkoti | xka | xka | kalk1245 | Kalkot, Sheringal, Upper Dir, Malakand, Khyber Pakhtunkhwa, Pakistan | 72.17480 | 35.40617 |
|  | Kashmiri (Ind) | kas(i) | kas | stan1304 | Srinagar, Kashmir, Jammu & Kashmir, India | 74.87453 | 33.96100 |
|  | Kashmiri (Pak) | kas(p) | kas | kash1277 | Sharda, Neelum, Azad Jammu & Kashmir, Pakistan | 74.17695 | 34.79469 |
|  | Khowar | khw | khw | nort2664 | Mastuj, Chitral, Malakand, Khyber Pakhtunkhwa, Pakistan | 72.51906 | 36.27825 |
|  | Kohistani Shina | plk | plk | pala1333 | Palas, Lower Kohistan, Hazara, Khyber Pakhtunkhwa, Pakistan | 73.18946 | 35.05837 |
|  | Kundal Shahi | shd | shd | kund1257 | Kundal Shahi, Athmuqam, Neelum, Azad Jammu & Kashmir, Pakistan | 73.82363 | 34.55627 |
|  | Pothwari | phr | phr | poth1238 | Rawalpindi, Punjab, Pakistan | 73.06263 | 33.57315 |
|  | Palula | phl | phl | ashr1238 | Ashret, Chitral, Malakand, Khyber Pakhtunkhwa, Pakistan | 71.73994 | 35.43939 |
|  | Pashai Alasai | psh(ai) | psh | alas1253 | Alasai, Kapisa, Afghanistan | 69.75581 | 34.94752 |
|  | Pashai Alingar | psi(ar) | psi | alin1238 | Alingar, Laghman, Afghanistan | 70.41725 | 34.86533 |
|  | Pashai Alishang | glh(ag) | glh | naji1238 | Alishang, Laghman, Afghanistan | 70.08457 | 34.92865 |
|  | Pashai Amla | psi(am) | psi | darr1238 | Amla, Darra-e-Nur, Nangarhar, Afghanistan | 70.57805 | 34.67743 |
|  | Pashai Aret | aee(at) | aee | aret1240 | Aret, Nurgal, Kunar, Afghanistan | 70.72301 | 34.74631 |
|  | Pashai Chalas | aee(ch) | aee | chal1263 | Chalas, Tsaoki, Kunar, Afghanistan | 70.86116 | 34.75934 |
|  | Pashai Korangal | aee(kg) | aee | kura1247 | Korangal, Mano Gai, Kunar, Afghanistan | 70.92458 | 34.90063 |
|  | Pashai Sanjan | glh(sn) | glh | sanj1275 | Sanjan, Hesa Awal Kohistan, Kapisa, Afghanistan | 69.36181 | 35.13991 |
|  | Pashai Shemal | aee(sh) | aee | kand1293 | Shemal, Darra-e-Nur, Nangarhar, Afghanistan | 70.56220 | 34.75934 |
|  | Sawi | sdg | sdg | savi1242 | Sau, Naray, Kunar, Afghanistan | 71.45683 | 35.17324 |
|  | Shina Gilgit | scl(p) | scl | gilg1242 | Gilgit, Gilgit-Baltistan, Pakistan | 74.30831 | 35.92140 |
|  | Shina Gurez | scl(i) | scl | gure1252 | Gurez, Bandipora, Kashmir, Jammu & Kashmir, India | 74.77488 | 34.63830 |
|  | Torwali | trw | trw | bahr1242 | Bahrain, Swat, Malakand, Khyber Pakhtunkhwa, Pakistan | 72.55077 | 35.20655 |
|  | Ushojo | ush | ush | usho1238 | Chail, Swat, Malakand, Khyber Pakhtunkhwa, Pakistan | 72.60512 | 35.12879 |
| Iranian | Darwazi | prs(d) | prs | darw1234 | Darwaz, Badakhshan, Afghanistan | 70.68450 | 38.33353 |
|  | Ishkashimi | isk | isk | ishk1244 | Ishkashim, Badakhshan, Afghanistan | 71.55875 | 36.73882 |
|  | Munji | mnj | mnj | nort2649 | Sharan, Kuran wa Munjan, Badakhshan, Afghanistan | 70.90873 | 35.96907 |
|  | Parachi | prc | prc | ghuj1238 | Ghochulan, Nijrab, Kapisa, Afghanistan | 69.64719 | 35.09915 |
|  | Pashto (Afg) | pbu(a) | pbu | nort2647 | Tagab, Kapisa, Afghanistan | 69.64719 | 34.83931 |
|  | Pashto (Ind) | pbu(i) | pbu | yusu1238 | Ganderbal, Kashmir, Jammu & Kashmir, India | 74.83829 | 34.26852 |
|  | Pashto (Pak) | pbu(p) | pbu | yusu1238 | Ghazi, Haripur, Hazara, Khyber Pakhtunkhwa, Pakistan | 72.78178 | 34.33962 |
|  | Rushani | sgh€ | sgh | rosh1238 | Roshan, Shughnan, Badakhshan, Afghanistan | 71.42285 | 37.89160 |
|  | Sanglechi | sgy | sgy | sang1344 | Sanglech, Zebak, Badakhshan, Afghanistan | 71.20996 | 36.29833 |
|  | Shughni | sgh(a) | sgh | nucl1239 | Shughnan, Badakhshan, Afghanistan | 71.44097 | 37.44340 |
|  | Wakhi (Afg) | wbl(a) | wbl | cent1975 | Abgach, Wakhan, Badakhshan, Afghanistan | 72.59606 | 36.98526 |
|  | Wakhi (Pak) | wbl(p) | wbl | goja1238 | Gojal, Hunza, Gilgit, Gilgit-Baltistan, Pakistan | 74.48950 | 36.83676 |
|  | Yidgha | ydg | ydg | yidg1240 | Garam Chashma, Chitral, Malakand, Khyber Pakhtunkhwa, Pakistan | 71.51571 | 35.98740 |
| Nuristani | Ashkun | ask | ask | ashu1242 | Titin, Nurgram, Nuristan, Afghanistan | 70.50105 | 35.03056 |
|  | Kamviri | xvi | xvi | nucl1277 | Kamdesh, Nuristan, Afghanistan | 71.33679 | 35.40986 |
|  | Kati (E) | bsh(e) | bsh | east2308 | Bargi Matal, Nuristan, Afghanistan | 71.33226 | 35.64028 |
|  | Kati (W) | bsh(w) | bsh | west2372 | Du Ab, Nuristan, Afghanistan | 70.34477 | 35.22691 |
|  | Prasun | prn | prn | lowe1390 | Pashki, Parun, Nuristan, Afghanistan | 70.90193 | 35.33045 |
|  | Waigali | wbk | wbk | chim1297 | Muldesh, Waigal, Nuristan, Afghanistan | 70.96082 | 35.13620 |
| Sino-Tibetan | Balti | bft | bft | balt1258 | Khaplu, Ghanche, Baltistan, Gilgit-Baltistan, Pakistan | 76.18363 | 35.23616 |
| Ladakhi | lbj | lbj | lehh1238 | Leh, Ladakh, Jammu & Kashmir, India | 77.25266 | 34.12240 |
|  | Purik | prx | prx | puri1258 | Kargil, Ladakh, Jammu & Kashmir, India | 76.01150 | 34.33588 |
| Turkic | Kyrgyz | kir | kir | kirg1245 | Pamirkalan, Wakhan, Badakhshan, Afghanistan | 73.97764 | 36.89837 |
|  | Uzbek | uzs | uzs | sout2699 | Argo, Badakhshan, Afghanistan | 70.38780 | 37.07386 |

**Table 2: 100-item word list.**

| bear (n) | eat (vb) | horn | name | son’s wife |
| --- | --- | --- | --- | --- |
| blood | eight | horse | new | star |
| bone | eye | house | night | stone |
| break (vb) | father | husband | nine | sun |
| breast | father’s brother | husband’s brother | nose | ten |
| brother | father’s father | husband’s father | one | three |
| brother’s wife (female ego) | father’s mother | husband’s mother | path | tongue |
| brother’s wife (male ego) | father’s sister | husband’s sister | person | tooth |
| come (vb) | fear (vb) | I | put (vb) | tree |
| cook (vb) | fill (vb) | knee | see | twenty |
| co-wife | fire | leaf | seven | two |
| cut (vb) | fish | liver | sister | wash (vb) |
| daughter | five | look (vb) | sister’s husband (female ego) | water |
| daughter’s daughter | flower | louse | sister’s husband (male ego) | we |
| daughter’s husband | four | mother | six | wife |
| daughter’s son | full | mother’s brother | skin | wife’s brother |
| die (vb) | give (vb) | mother’s father | snake | wife’s father |
| dog | go (vb) | mother’s mother | son | wife’s mother |
| drink (vb) | hand | mother’s sister | son’s daughter | wife’s sister |
| ear | hear (vb) | mountain | son’s son | you |

**Table 3: Structural features (80 features).**

| *Lexico-semantics (16 features)* | LX01a: Kinship: F=FB | LX02b: Vigesimal Numeral Base | LX06a: Kinship: Grandchildren by Sex |
| --- | --- | --- | --- |
|  | LX01b: Kinship: FB=MB | LX03a: Numeral Composition 10+n | LX06b: Kinship: Grandchildren by Children’s Sex |
|  | LX01c: Kinship: M=MZ | LX03b: Numeral Composition 20+n | LX07: Colexification: hide=steal |
|  | LX01d: Kinship: MZ=FZ | LX04a: Kinship: Parent Compound | LX08: Colexification: woman=wife |
|  | LX01e: Kinship: MB=FZ | LX04b: Kinship: M-F Compound |  |
|  | LX02a: Decimal Numeral Base | LX05: Kinship: Grandparents by Parent’s Sex |  |
| ***Phonology (16 features)*** | PH01a: Retroflexion | PH03b: CCV structure | PH06: Uvulars |
|  | PH01b: Retroflex Plosives | PH03c: CCCV structure | PH07: Nasalized Vowels |
|  | PH01c: Retroflex Fricatives | PH03d: (C)VCC structure | PH08a: Small Consonant Inventory |
|  | PH02a: Dental Affricates | PH04: Lateral Fricatives | PH08b: Large Consonant Inventory |
|  | PH02b: Retroflex Affricates | PH05a: Aspiration Contrast (Voiceless) |  |
|  | PH03a: (C)VC structure | PH05b: Aspiration Contrast (Voiced) |  |
| ***Grammatical categories (16 features)*** | GC01a: Grammatical Gender | GC02d: Unique Recipient Case | GC06a: Prepositional Coding of Location |
|  | GC01b: Sex-based Gender | GC03: Multi-value Distance Contrast | GC06b: Postpositional Coding of Location |
|  | GC01c: Animacy-based Gender | GC04a: Prepositional Coding of Source | GC07a: Possessive Prefixes |
|  | GC02a: Unique A Case | GC04b: Postpositional Coding of Source | GC07b: Possessive Suffixes |
|  | GC02b: Unique S Case | GC05a: Prepositional Coding of Goal |  |
|  | GC02c: Unique P Case | GC05b: Postpositional Coding of Goal |  |
| ***Clause structure (16 features)*** | CS01a: Ergative Alignment (Nouns) | CS03c: Shared Encoding of Nominal and Adjectival Predicates | CS06c: Theme=Recipient occurrence |
|  | CS01b: Accusative Alignment (Nouns) | CS04a: Ergative Alignment of Verbal Marking | CS07: P-A Agreement Order |
|  | CS02a: A Agreement (Past) | CS04b: Accusative Alignment of Verbal Marking | CS08: Verbal Person Agreement |
|  | CS02b: P Agreement (Past) | CS05: Non-nominative Experiencer | CS09: Verbal Gender Agreement |
|  | CS03a: Zero Copula for Predicate Nominals | CS06a: Theme=P occurrence |  |
|  | CS03b: Zero Copula for Predicate Adjective | CS06b: Recipient=P occurrence |  |
| ***Word order (16 features)*** | WO01a: VO Word Order | WO04a: Initial Polar Question Particle | WO07b: Obl Obj Word Order |
|  | WO01b: OV Word Order | WO04b: Final Polar Question Particle | WO08: SV Word Order |
|  | WO02a: Adpositions | WO05a: Adj N Word Order | WO09: Gen N Word Order |
|  | WO02b: Postpositions | WO05b: N Adj Word Order | WO10: Poss N Word Order |
|  | WO02c: Prepositions | WO06: Dem N Word Order |  |
|  | WO03: Initial Interrogative in Content Question | WO07a: Obj Obl Word Order |  |

**Table 4: Feature values**

***Grammatical categories (16 features)***

| Variety | Code | GC01a | GC01b | GC01c | GC02a | GC02b | GC02c | GC02d | GC03 | GC04a | GC04b | GC05a | GC05b | GC06a | GC06b | GC07a | GC07b |
| --- | --- | --- | --- | --- | --- | --- | --- | --- | --- | --- | --- | --- | --- | --- | --- | --- | --- |
| Ashkun | ask | 1 | 1 | 0 | 1 | 0 | 0 | 1 | 0 | 0 | 1 | 0 | 1 | 0 | 1 | 0 | 1 |
| Balti | bft | 0 | 0 | 0 | 1 | 0 | 0 | 1 | 0 | 0 | 1 | 0 | 0 | 0 | 1 | 0 | 0 |
| Bateri | btv | 1 | 1 | 0 | 0 | 0 | 0 | 1 | 0 | 0 | 1 | 0 | 1 | 0 | 1 | 0 | 0 |
| Brokskat | bkk | 1 | 1 | 0 | 1 | 0 | 0 | 1 | 1 | 0 | 1 | 0 | 1 | 0 | 1 | 0 | 0 |
| Burushaski H | bsk (h) | 1 | 1 | 1 | 1 | 0 | 0 | 1 | 1 | 0 | 1 | 0 | 1 | 0 | 1 | 1 | 0 |
| Burushaski N | bsk (n) | 1 | 1 | 1 | 1 | 0 | 0 | 1 | ? | 0 | 1 | 0 | 1 | 0 | 1 | 1 | 0 |
| Dameli | dml | 1 | 1 | 1 | 1 | 0 | 0 | 1 | 0 | 0 | 1 | 0 | 0 | 0 | 1 | 0 | ? |
| Darwazi | prs (d) | 0 | 0 | 0 | 0 | 0 | 1 | 1 | 0 | 1 | 0 | 1 | 1 | 1 | 0 | 0 | 1 |
| Gawarbati A | gwt (a) | 1 | 1 | 0 | 1 | 1 | 1 | 1 | 0 | 0 | 1 | 0 | 1 | 0 | 1 | 0 | 1 |
| Gawarbati P | gwt (p) | 1 | 1 | 0 | 1 | 1 | 1 | 1 | 0 | 0 | 1 | 0 | 0 | 0 | 1 | 0 | ? |
| Gawri | gwc | 1 | 1 | 0 | 1 | 0 | 0 | 1 | 0 | 0 | 1 | 0 | 1 | 0 | 1 | 0 | 0 |
| Gojri A | gju (a) | 1 | 1 | 0 | 1 | 1 | 1 | 1 | 0 | 0 | 1 | 0 | 1 | 0 | 1 | 0 | 0 |
| Gojri P | gju (p) | 1 | 1 | 0 | 1 | 1 | 0 | 0 | 0 | 0 | 1 | 0 | 0 | 0 | 1 | 0 | 0 |
| Hindko | hno | 1 | 1 | 0 | 1 | 1 | 0 | 0 | 0 | 0 | 1 | 0 | 0 | 0 | 1 | 0 | 0 |
| Indus Kohistani | mvy | 1 | 1 | 0 | 1 | 0 | 0 | 1 | 0 | 0 | 1 | 0 | 1 | 0 | 1 | 0 | 0 |
| Ishkashimi | isk | 0 | 0 | 0 | 0 | 0 | 1 | 1 | 0 | 1 | 0 | 1 | 0 | 1 | 0 | 0 | 0 |
| Kalasha | kls | 1 | 0 | 1 | 0 | 0 | 1 | 1 | 1 | 0 | 1 | 0 | 1 | 0 | 1 | 0 | ? |
| Kalkoti | xka | 1 | 1 | 0 | 1 | 0 | 0 | 1 | 0 | 0 | 1 | 0 | 1 | 0 | 1 | 0 | 0 |
| Kamviri | xvi | 1 | 1 | 0 | 1 | 0 | 0 | 1 | 0 | 0 | 1 | 0 | 1 | 0 | 1 | 0 | 1 |
| Kashmiri I | kas (i) | 1 | 1 | 0 | 1 | 1 | 0 | 0 | 1 | 0 | 1 | 0 | 0 | 0 | 1 | 0 | 0 |
| Kashmiri P | kas (p) | 1 | 1 | 0 | 1 | 1 | 0 | 0 | 1 | 0 | 1 | 0 | 0 | 0 | 1 | 0 | 0 |
| Kati E | bsh (e) | 1 | 1 | 0 | 1 | 1 | 1 | 1 | 0 | 0 | 1 | 0 | 1 | 0 | 1 | 0 | 1 |
| Kati W | bsh (w) | 1 | 1 | 0 | 1 | 0 | 0 | 1 | 0 | 0 | 1 | 0 | 1 | 0 | ? | 0 | 1 |
| Khowar | khw | 1 | 0 | 1 | 0 | 0 | 1 | 1 | 0 | 0 | 1 | 0 | 1 | 0 | 1 | 0 | 0 |
| Koh Shina | plk | 1 | 1 | 0 | 1 | 0 | 0 | 1 | 0 | 0 | 1 | 0 | 1 | 0 | 1 | 0 | 0 |
| Kundal Shahi | shd | 1 | 1 | 0 | 1 | 1 | 0 | 0 | 0 | 0 | 1 | 0 | 0 | 0 | 1 | 0 | 0 |
| Kyrgyz | kir | 0 | 0 | 0 | 0 | 0 | 1 | 1 | ? | 0 | 1 | 0 | 1 | 0 | 1 | 0 | 1 |
| Ladakhi | lbj | 0 | 0 | 0 | 1 | 0 | 0 | 1 | 1 | 0 | 1 | 0 | 1 | 0 | 1 | 0 | 0 |
| Munji | mnj | 1 | 1 | 0 | 1 | 1 | 1 | 1 | 0 | 1 | 1 | 1 | 1 | 1 | 0 | 0 | 1 |
| Pahari-Pothwari | phr | 1 | 1 | 0 | 1 | 1 | 0 | 0 | 0 | 0 | 1 | 0 | 0 | 0 | 1 | 0 | 0 |
| Palula | phl | 1 | 1 | 0 | 1 | 0 | 0 | 1 | 0 | 0 | 1 | 0 | 1 | 0 | 1 | 0 | 0 |
| Parachi | prc | 0 | 0 | 0 | 0 | 0 | 1 | 1 | 1 | 0 | 1 | 0 | 0 | 1 | 0 | 0 | 1 |
| Pashai Alasai | psh (ai) | 1 | 1 | 0 | 0 | 0 | 0 | 1 | 1 | 0 | 1 | 0 | 1 | 0 | 0 | 0 | 1 |
| Pashai Alingar | psi (ar) | 1 | 1 | 1 | 1 | 0 | 0 | 1 | 1 | 0 | 1 | 0 | 1 | 0 | 1 | 0 | 1 |
| Pashai Alishang | glh (ag) | 1 | 1 | 0 | 0 | 0 | 0 | 1 | 1 | 0 | 1 | 0 | 1 | 0 | 1 | 0 | 1 |
| Pashai Amla | psi (am) | 1 | 1 | 1 | 1 | 0 | 0 | 1 | 1 | 0 | 1 | 0 | 1 | 0 | 1 | 0 | 1 |
| Pashai Aret | aee (at) | 1 | 1 | 1 | 0 | 0 | 0 | 0 | 0 | 0 | 1 | 0 | 1 | 0 | 1 | 0 | 1 |
| Pashai Chalas | aee (ch) | 1 | 1 | 1 | 0 | 0 | 0 | 0 | 0 | 0 | 1 | 0 | 1 | 0 | 1 | 0 | 1 |
| Pashai Korangal | aee (kg) | 1 | 1 | 1 | 1 | 0 | 0 | 1 | 0 | 0 | 1 | 0 | 1 | 0 | ? | 0 | 1 |
| Pashai Sanjan | glh (sn) | 1 | 1 | 0 | 0 | 0 | 1 | 1 | 0 | 0 | ? | 0 | 1 | 0 | 1 | 0 | 1 |
| Pashai Shemal | aee (sh) | 1 | 1 | 1 | 1 | 0 | 0 | 1 | 0 | 0 | 1 | 0 | 1 | 0 | 1 | 0 | 1 |
| Pashto A | pbu (a) | 1 | 1 | 0 | 1 | 0 | 0 | 1 | 1 | 1 | 1 | 0 | 1 | 1 | 1 | 0 | 1 |
| Pashto I | pbu (i) | 1 | 1 | 0 | 1 | 0 | 0 | 1 | 1 | 0 | 1 | 0 | 1 | 0 | 1 | 0 | 0 |
| Pashto P | pbu (p) | 1 | 1 | 0 | 1 | 0 | 0 | 1 | 0 | 1 | 1 | 0 | 1 | 1 | 1 | 0 | 0 |
| Prasun | prn | 0 | 0 | 0 | 0 | 0 | 1 | 1 | 1 | 0 | 1 | 0 | 0 | 0 | 1 | 0 | 0 |
| Purik | prx | 0 | 0 | 0 | 1 | 0 | 0 | 1 | 1 | 0 | 1 | 0 | 1 | 0 | 1 | 0 | 0 |
| Rushani | sgh (r) | 1 | 1 | 0 | 0 | 0 | 0 | 1 | 1 | 1 | 1 | 1 | 0 | 0 | 1 | 0 | 0 |
| Sanglechi | sgy | 0 | 0 | 0 | 0 | 0 | 1 | 1 | 1 | 1 | 0 | 0 | 1 | 1 | 0 | 0 | 0 |
| Sawi | sdg | 1 | 1 | 0 | 1 | 0 | 0 | 1 | 0 | 0 | 1 | 0 | 0 | 0 | 1 | 0 | 0 |
| Shina Gilgit | scl (p) | 1 | 1 | 0 | 1 | 0 | 0 | 1 | 0 | 0 | 1 | 0 | 1 | 0 | 1 | 0 | 0 |
| Shina Gurez | scl (i) | 1 | 1 | 0 | 1 | 1 | 1 | 1 | 1 | 0 | 1 | 0 | 1 | 0 | 1 | 0 | 0 |
| Shughni | sgh (a) | 1 | 1 | 0 | 0 | 0 | 1 | 1 | 1 | 1 | 1 | 1 | 0 | 1 | 0 | 0 | 0 |
| Torwali | trw | 1 | 1 | 0 | 1 | 0 | 0 | 1 | 0 | 0 | 1 | 0 | 1 | 0 | 1 | 0 | 0 |
| Ushojo | ush | 1 | 1 | 0 | 1 | 0 | 0 | 1 | 0 | 0 | 1 | 0 | 1 | 0 | 1 | 0 | 0 |
| Uzbek | uzs | 0 | 0 | 0 | 0 | 0 | 1 | 1 | 1 | 0 | 1 | 0 | 1 | 0 | 1 | 0 | 1 |
| Waigali | wbk | 1 | 1 | 0 | 1 | 0 | 0 | 0 | 1 | 0 | 1 | 0 | 0 | 0 | 1 | 0 | 1 |
| Wakhi A | wbl (a) | 0 | 0 | 0 | 0 | 0 | 1 | 1 | 1 | 1 | 1 | 0 | 0 | 1 | 0 | 0 | 0 |
| Wakhi P | wbl (p) | 0 | 0 | 0 | 1 | 0 | 0 | 1 | 1 | 1 | 1 | 1 | 0 | 1 | 0 | 0 | 0 |
| Yidgha | ydg | 1 | 1 | 0 | 1 | 1 | 1 | 1 | 1 | 1 | 1 | 1 | 0 | 1 | 0 | 0 | 0 |
| Urdu | urd | 1 | 1 | 0 | 1 | 1 | 0 | 0 | 0 | 0 | 1 | 0 | 0 | 0 | 1 | 0 | 0 |
| Dari Standard | prs | 0 | 0 | 0 | 0 | 0 | 1 | 1 | 0 | 1 | 0 | 1 | 0 | 1 | 0 | 0 | 1 |

***Phonology (16 features)***

| Variety | Code | PH01a | PH01b | PH01c | PH02a | PH02b | PH03a | PH03b | PH03c | PH03d | PH04 | PH05a | PH05b | PH06 | PH07 | PH08a | PH08b |
| --- | --- | --- | --- | --- | --- | --- | --- | --- | --- | --- | --- | --- | --- | --- | --- | --- | --- |
| Ashkun | ask | 1 | 1 | 1 | 1 | 1 | 1 | 1 | 0 | 1 | 0 | 0 | 0 | 0 | 1 | 0 | 1 |
| Balti | bft | 1 | 1 | 0 | 1 | 0 | 1 | 1 | 1 | 0 | 1 | 1 | 0 | 1 | 0 | 0 | 1 |
| Bateri | btv | 1 | 1 | 1 | 1 | 1 | 1 | 0 | 0 | 0 | 0 | 1 | 1 | ? | 1 | 0 | 1 |
| Brokskat | bkk | 1 | 1 | 1 | 1 | 0 | 1 | 1 | 0 | 0 | 0 | 1 | 0 | 1 | 0 | 0 | 1 |
| Burushaski H | bsk (h) | 1 | 1 | 1 | 1 | 1 | 1 | 0 | 0 | 0 | 0 | 1 | 0 | 1 | 0 | 0 | 0 |
| Burushaski N | bsk (n) | 1 | 1 | 1 | 1 | 1 | 1 | 0 | 0 | 0 | 0 | 1 | 0 | 1 | 1 | 0 | 0 |
| Dameli | dml | 1 | 1 | 1 | 1 | 1 | 1 | 1 | 0 | 0 | 0 | 1 | 0 | 0 | 1 | 0 | 1 |
| Darwazi | prs (d) | 0 | 0 | 0 | 0 | 0 | 1 | 0 | 0 | 1 | 0 | 0 | 0 | 1 | 0 | 0 | 0 |
| Gawarbati A | gwt (a) | 1 | 1 | 1 | 1 | 0 | 1 | 1 | 0 | 1 | 1 | 0 | 0 | 0 | 0 | 0 | 0 |
| Gawarbati P | gwt (p) | 1 | 1 | 1 | 1 | 1 | 1 | 0 | 0 | 1 | 1 | 1 | 0 | 0 | 1 | 0 | 1 |
| Gawri | gwc | 1 | 1 | 1 | 1 | 1 | 1 | 0 | 0 | 0 | 1 | 1 | 0 | 1 | 1 | 0 | 0 |
| Gojri A | gju (a) | 1 | 1 | 0 | 1 | 0 | 1 | 1 | 0 | 1 | 0 | 1 | 1 | 0 | 1 | 0 | 0 |
| Gojri P | gju (p) | 1 | 1 | 0 | 1 | 0 | 1 | 1 | 0 | 1 | 0 | 1 | 0 | 0 | 1 | 0 | 1 |
| Hindko | hno | 1 | 1 | 0 | 0 | 0 | 1 | 1 | 0 | 1 | 0 | 1 | 0 | 0 | 1 | 0 | 0 |
| Indus Kohistani | mvy | 1 | 1 | 1 | 1 | 1 | 1 | 0 | 0 | 0 | 0 | 1 | 1 | 1 | 1 | 0 | 1 |
| Ishkashimi | isk | 0 | 0 | 0 | 1 | 0 | 1 | 1 | 0 | 1 | 0 | 0 | 0 | 1 | 0 | 0 | 0 |
| Kalasha | kls | 1 | 1 | 1 | 1 | 1 | 1 | 1 | 0 | 1 | 0 | 1 | 1 | 0 | 1 | 0 | 1 |
| Kalkoti | xka | 1 | 1 | 1 | 1 | 1 | 1 | 1 | 0 | 0 | 0 | 1 | 0 | 0 | 0 | 0 | 1 |
| Kamviri | xvi | 1 | 1 | 1 | 1 | 1 | 1 | 1 | 1 | 1 | 0 | 0 | 0 | 0 | 1 | 0 | 0 |
| Kashmiri I | kas (i) | 1 | 1 | 0 | 1 | 0 | 1 | 1 | 0 | 1 | 0 | 1 | 0 | 0 | 1 | 0 | 1 |
| Kashmiri P | kas (p) | 1 | 1 | 0 | 1 | 0 | 1 | 1 | 0 | 1 | 0 | 1 | 0 | 0 | 1 | 0 | 0 |
| Kati E | bsh (e) | 1 | 1 | 1 | 1 | 1 | 1 | 1 | 0 | 1 | 0 | 0 | 0 | 1 | 1 | 1 | 0 |
| Kati W | bsh (w) | 1 | 1 | 1 | 1 | 1 | 1 | 1 | 1 | 1 | 0 | 0 | 0 | 1 | 0 | 0 | 0 |
| Khowar | khw | 1 | 1 | 1 | 1 | 1 | 1 | 1 | 0 | 1 | 0 | 1 | 0 | 1 | 0 | 0 | 1 |
| Koh Shina | plk | 1 | 1 | 1 | 1 | 1 | 1 | 0 | 0 | 0 | 0 | 1 | 0 | 1 | 1 | 0 | 0 |
| Kundal Shahi | shd | 1 | 1 | 0 | 0 | 0 | 1 | 1 | 0 | 1 | 0 | 1 | 0 | 0 | 1 | 0 | 0 |
| Kyrgyz | kir | 0 | 0 | 0 | 0 | 0 | 1 | 0 | 0 | 1 | 0 | 0 | 0 | 1 | 0 | 1 | 0 |
| Ladakhi | lbj | 1 | 1 | 0 | 1 | 0 | 1 | 1 | 1 | 0 | 1 | 1 | 0 | 0 | 0 | 0 | 0 |
| Munji | mnj | 1 | 0 | 1 | 0 | 0 | 1 | 1 | 0 | 1 | 0 | 0 | 0 | 1 | 0 | 0 | 0 |
| Pahari-Pothwari | phr | 1 | 1 | 0 | 0 | 0 | 1 | 1 | 0 | 1 | 0 | 1 | 0 | 0 | 1 | 0 | 1 |
| Palula | phl | 1 | 1 | 1 | 1 | 1 | 1 | 1 | 0 | 1 | 0 | 1 | 1 | 0 | 0 | 0 | 1 |
| Parachi | prc | 1 | 1 | 0 | 0 | 0 | 1 | 0 | 0 | 1 | 0 | 1 | 1 | 1 | 0 | 0 | 0 |
| Pashai Alasai | psh (ai) | 1 | 1 | 1 | 1 | 0 | 1 | 1 | 0 | 1 | 0 | 0 | 0 | 0 | 0 | 0 | 0 |
| Pashai Alingar | psi (ar) | 1 | 1 | 0 | 1 | 0 | 1 | 1 | 0 | 1 | 0 | 0 | 0 | 1 | 0 | 0 | 0 |
| Pashai Alishang | glh (ag) | 1 | 1 | 0 | 1 | 1 | 1 | 1 | 0 | 1 | 0 | 0 | 0 | 0 | 0 | 0 | 0 |
| Pashai Amla | psi (am) | 1 | 1 | 0 | 1 | 0 | 1 | 0 | 0 | 1 | 1 | 0 | 0 | 0 | 0 | 0 | 0 |
| Pashai Aret | aee (at) | 1 | 1 | 0 | 0 | 0 | 1 | 1 | 0 | 1 | 0 | 0 | 0 | 1 | 1 | 0 | 0 |
| Pashai Chalas | aee (ch) | 1 | 1 | 0 | 1 | 0 | 1 | 0 | 0 | 1 | 1 | 0 | 0 | 1 | 0 | 0 | 0 |
| Pashai Korangal | aee (kg) | 1 | 1 | 0 | 1 | 0 | 1 | 1 | 0 | 1 | 1 | 0 | 0 | 1 | 0 | 0 | 0 |
| Pashai Sanjan | glh (sn) | 1 | 1 | 1 | 0 | 0 | 1 | 1 | 0 | 1 | 0 | 0 | 0 | 1 | 0 | 0 | 0 |
| Pashai Shemal | aee (sh) | 1 | 1 | 0 | 1 | 0 | 1 | 0 | 0 | 1 | 1 | 0 | 0 | 1 | 0 | 0 | 0 |
| Pashto A | pbu (a) | 1 | 1 | 0 | 1 | 0 | 1 | 1 | 0 | 0 | 0 | 0 | 0 | 1 | 0 | 0 | 0 |
| Pashto I | pbu (i) | 1 | 1 | 0 | 1 | 0 | 1 | 1 | 0 | 1 | 0 | 0 | 0 | 1 | 0 | 0 | 0 |
| Pashto P | pbu (p) | 1 | 1 | 0 | 1 | 0 | 1 | 1 | 0 | 0 | 0 | 0 | 0 | 1 | 0 | 0 | 0 |
| Prasun | prn | 1 | 1 | 1 | 1 | 0 | 1 | 0 | 0 | 1 | 0 | 0 | 0 | 0 | 0 | 0 | 0 |
| Purik | prx | 0 | 0 | 0 | 1 | 0 | 1 | 1 | 1 | 0 | 1 | 1 | 0 | 1 | 0 | 0 | 0 |
| Rushani | sgh (r) | 1 | 0 | 1 | 1 | 0 | 1 | 1 | 0 | 1 | 0 | 0 | 0 | 1 | 0 | 0 | 0 |
| Sanglechi | sgy | 1 | 1 | 1 | 1 | 0 | 1 | 1 | 1 | 1 | 0 | 0 | 0 | 1 | 0 | 0 | 0 |
| Sawi | sdg | 1 | 1 | 1 | 1 | 1 | 1 | 1 | 0 | 0 | 1 | 1 | 0 | 0 | 0 | 0 | 0 |
| Shina Gilgit | scl (p) | 1 | 1 | 1 | 1 | 1 | 1 | 0 | 0 | 0 | 0 | 1 | 0 | 0 | 1 | 0 | 0 |
| Shina Gurez | scl (i) | 1 | 1 | 1 | 1 | 1 | 1 | 0 | 0 | 1 | 0 | 1 | 0 | 0 | 1 | 0 | 1 |
| Shughni | sgh (a) | 1 | 0 | 1 | 1 | 0 | 1 | 1 | 0 | 1 | 0 | 0 | 0 | 1 | 0 | 0 | 0 |
| Torwali | trw | 1 | 1 | 1 | 1 | 1 | 1 | 0 | 0 | 0 | 0 | 1 | 1 | 0 | 1 | 0 | 1 |
| Ushojo | ush | 1 | 1 | 1 | 1 | 1 | 1 | 0 | 0 | 1 | 0 | 1 | 1 | 0 | 1 | 0 | 1 |
| Uzbek | uzs | 0 | 0 | 0 | 0 | 0 | 1 | 0 | 0 | 1 | 0 | 0 | 0 | 1 | 0 | 0 | 0 |
| Waigali | wbk | 1 | 1 | 1 | 1 | ? | 1 | 1 | 0 | 1 | 0 | 0 | 0 | 1 | 0 | 0 | 0 |
| Wakhi A | wbl (a) | 1 | 0 | 1 | 1 | 1 | 1 | 0 | 0 | 1 | 1 | 0 | 0 | 1 | 0 | 0 | 0 |
| Wakhi P | wbl (p) | 1 | 1 | 1 | 1 | 1 | 1 | 1 | 0 | 1 | 1 | 0 | 0 | 1 | 0 | 0 | 1 |
| Yidgha | ydg | 1 | 1 | 1 | 0 | 0 | 1 | 1 | 0 | 1 | 0 | 1 | 0 | 1 | 0 | 0 | 1 |
| Urdu | urd | 1 | 1 | 0 | 0 | 0 | 1 | 1 | 0 | 1 | 0 | 1 | 1 | 1 | 1 | 0 | 0 |
| Dari Standard | prs | 0 | 0 | 0 | 0 | 0 | 1 | 0 | 0 | 1 | 0 | 0 | 0 | 1 | 0 | 0 | 0 |

***Word order (16 features)***

| Variety | Code | WO01a | WO01b | WO02a | WO02b | WO02c | WO03 | WO04a | WO04b | WO05a | WO05b | WO06 | WO07a | WO07b | WO08 | WO09 | WO10 |
| --- | --- | --- | --- | --- | --- | --- | --- | --- | --- | --- | --- | --- | --- | --- | --- | --- | --- |
| Ashkun | ask | 0 | 1 | 1 | 1 | 0 | 0 | 1 | 0 | 1 | 0 | 1 | 1 | 1 | 1 | 1 | 1 |
| Balti | bft | 0 | 1 | 1 | 1 | 0 | 0 | 0 | 1 | 1 | 1 | 1 | 0 | 1 | 1 | 1 | 1 |
| Bateri | btv | 0 | 1 | 1 | 1 | 0 | 0 | 0 | 0 | 1 | 0 | 1 | 0 | 1 | 1 | 1 | 1 |
| Brokskat | bkk | 0 | 1 | 1 | 1 | 0 | 0 | 0 | 1 | 1 | 0 | 1 | 0 | 1 | 1 | 1 | 1 |
| Burushaski H | bsk (h) | 0 | 1 | 1 | 1 | 0 | 0 | 0 | 1 | 1 | 0 | 1 | 0 | 1 | 1 | 1 | 1 |
| Burushaski N | bsk (n) | 0 | 1 | 1 | 1 | 0 | 0 | 0 | 1 | 1 | 0 | 1 | 0 | 1 | 1 | 1 | 1 |
| Dameli | dml | 0 | 1 | 1 | 1 | 0 | 0 | 0 | 1 | 1 | 0 | 1 | 0 | 1 | 1 | 1 | 1 |
| Darwazi | prs (d) | 0 | 1 | 1 | 1 | 1 | 0 | 0 | 0 | 0 | 1 | 1 | 1 | 0 | 1 | 0 | 0 |
| Gawarbati A | gwt (a) | 0 | 1 | 1 | 1 | 0 | 0 | 1 | 1 | 1 | 0 | 1 | 1 | 1 | 1 | 1 | 1 |
| Gawarbati P | gwt (p) | 0 | 1 | 1 | 1 | 0 | 0 | 0 | 1 | 1 | 0 | 1 | 1 | 1 | 1 | 1 | 1 |
| Gawri | gwc | 0 | 1 | 1 | 1 | 0 | 0 | 0 | 1 | 1 | 0 | 1 | 0 | 1 | 1 | 1 | 1 |
| Gojri A | gju (a) | 0 | 1 | 1 | 1 | 0 | 0 | 1 | 0 | 1 | 0 | 1 | 1 | 1 | 1 | 1 | 1 |
| Gojri P | gju (p) | 0 | 1 | 1 | 1 | 0 | 0 | 0 | 0 | 1 | 0 | 1 | 0 | 1 | 1 | 1 | 1 |
| Hindko | hno | 0 | 1 | 1 | 1 | 0 | 0 | 0 | 0 | 1 | 0 | 1 | 0 | 1 | 1 | 1 | 1 |
| Indus Kohistani | mvy | 0 | 1 | 1 | 1 | 0 | 0 | 0 | 1 | 1 | 0 | 1 | 0 | 1 | 1 | 1 | 1 |
| Ishkashimi | isk | 0 | 1 | 1 | 1 | 1 | 0 | 1 | 0 | 0 | 1 | 1 | 1 | 0 | 1 | 1 | 1 |
| Kalasha | kls | 0 | 1 | 1 | 1 | 0 | 0 | 0 | 1 | 1 | 0 | 1 | 1 | 1 | 1 | 1 | 1 |
| Kalkoti | xka | 0 | 1 | 1 | 1 | 0 | 0 | 0 | 1 | 1 | 0 | 1 | 0 | 1 | 1 | 1 | 1 |
| Kamviri | xvi | 0 | 1 | 1 | 1 | 0 | 0 | 1 | 0 | 1 | 0 | 1 | 1 | 1 | 1 | 1 | 1 |
| Kashmiri I | kas (i) | 1 | 1 | 1 | 1 | 0 | 0 | 0 | 0 | 1 | 0 | 1 | 1 | 1 | 1 | 1 | 1 |
| Kashmiri P | kas (p) | 1 | 1 | 1 | 1 | 0 | 0 | 0 | 0 | 1 | 0 | 1 | 1 | 1 | 1 | 1 | 1 |
| Kati E | bsh (e) | 0 | 1 | 1 | 1 | 0 | 0 | 0 | 0 | 1 | 0 | 1 | 1 | 0 | 1 | 1 | 1 |
| Kati W | bsh (w) | 0 | 1 | 1 | 1 | 0 | 0 | 1 | 0 | 1 | 0 | 1 | 1 | 0 | 1 | 1 | 1 |
| Khowar | khw | 0 | 1 | 1 | 1 | 0 | 0 | 0 | 1 | 1 | 0 | 1 | 0 | 1 | 1 | 1 | 1 |
| Koh Shina | plk | 0 | 1 | 1 | 1 | 0 | 0 | 0 | 1 | 1 | 0 | 1 | 0 | 1 | 1 | 1 | 1 |
| Kundal Shahi | shd | 0 | 1 | 1 | 1 | 0 | 0 | 0 | 0 | 1 | 0 | 1 | 0 | 1 | 1 | 1 | 1 |
| Kyrgyz | kir | 0 | 1 | 1 | 1 | 0 | 0 | 1 | 1 | ? | 1 | 1 | 1 | 1 | 1 | 1 | 1 |
| Ladakhi | lbj | 0 | 1 | ? | ? | 0 | 0 | 0 | 1 | 0 | 1 | 1 | 1 | 1 | 1 | ? | 1 |
| Munji | mnj | 0 | 1 | 1 | 0 | 1 | 0 | 1 | 0 | 1 | 0 | 1 | 1 | 0 | 1 | 1 | 1 |
| Pahari-Pothwari | phr | 0 | 1 | 1 | 1 | 0 | 0 | 0 | 0 | 1 | 0 | 1 | 0 | 1 | 1 | ? | 1 |
| Palula | phl | 0 | 1 | 1 | 1 | 0 | 0 | 0 | 1 | 1 | 0 | 1 | 1 | 1 | 1 | 1 | 1 |
| Parachi | prc | 0 | 1 | 1 | 1 | 0 | 0 | 1 | 0 | 1 | ? | 1 | 1 | 0 | 1 | 0 | 1 |
| Pashai Alasai | psh (ai) | 0 | 1 | 1 | 1 | 0 | 0 | 0 | 0 | 1 | 0 | 1 | 1 | 0 | 1 | 1 | 1 |
| Pashai Alingar | psi (ar) | 0 | 1 | 1 | 1 | 0 | 0 | 1 | 0 | 1 | 0 | 1 | 1 | 1 | 1 | 1 | 1 |
| Pashai Alishang | glh (ag) | 0 | 1 | 1 | 1 | 0 | 0 | 1 | 0 | 1 | 0 | 1 | 1 | 1 | 1 | 1 | 1 |
| Pashai Amla | psi (am) | 0 | 1 | 1 | 1 | 0 | 0 | 0 | 0 | 1 | 0 | 1 | 1 | 1 | 1 | ? | 1 |
| Pashai Aret | aee (at) | 0 | 1 | 1 | 1 | 0 | 0 | 0 | 0 | 1 | 0 | 1 | 1 | 1 | 1 | 1 | 1 |
| Pashai Chalas | aee (ch) | 0 | 1 | 1 | 1 | 0 | 0 | 0 | 1 | 1 | ? | 1 | 1 | 1 | 1 | 1 | 1 |
| Pashai Korangal | aee (kg) | 0 | 1 | 1 | 1 | 0 | 0 | 0 | 0 | 1 | 0 | 1 | 1 | 1 | 1 | 1 | 1 |
| Pashai Sanjan | glh (sn) | 0 | 1 | 1 | 1 | 0 | 0 | 1 | 0 | 1 | 0 | 1 | 1 | 0 | 1 | 1 | 1 |
| Pashai Shemal | aee (sh) | 0 | 1 | 1 | 1 | 0 | 0 | 1 | 0 | 1 | ? | 1 | 1 | 1 | 1 | 1 | 1 |
| Pashto A | pbu (a) | 0 | 1 | 1 | 1 | 1 | 0 | 1 | 0 | 1 | 0 | 1 | 0 | 1 | 1 | ? | 1 |
| Pashto I | pbu (i) | 0 | 1 | 1 | 1 | 0 | 0 | 0 | 0 | 1 | 0 | 1 | 0 | 1 | 1 | 1 | 1 |
| Pashto P | pbu (p) | 0 | 1 | 1 | 1 | 1 | 0 | 0 | 0 | 1 | 0 | 1 | 0 | 1 | 1 | 1 | 1 |
| Prasun | prn | 0 | 1 | 1 | 1 | 0 | 0 | 0 | 1 | 1 | 0 | 1 | 1 | 1 | 1 | 1 | 1 |
| Purik | prx | 0 | 1 | 1 | 1 | 0 | 0 | 0 | 1 | 1 | 1 | 1 | 0 | 1 | 1 | 1 | 1 |
| Rushani | sgh (r) | 0 | 1 | 1 | 1 | 1 | 0 | 1 | 1 | 1 | 1 | 1 | 1 | 0 | 1 | 1 | 1 |
| Sanglechi | sgy | 0 | 1 | 1 | 1 | 1 | 0 | 1 | 0 | 1 | 0 | 1 | 1 | 0 | 1 | 1 | 1 |
| Sawi | sdg | 0 | 1 | 1 | 1 | 0 | 0 | 1 | 0 | 1 | 0 | 1 | 0 | 1 | 1 | 1 | 1 |
| Shina Gilgit | scl (p) | 0 | 1 | 1 | 1 | 0 | 0 | 0 | 1 | 1 | 0 | 1 | 0 | 1 | 1 | 1 | 1 |
| Shina Gurez | scl (i) | 0 | 1 | 1 | 1 | 0 | 0 | 0 | 1 | 1 | 0 | 1 | 0 | 1 | 1 | 1 | 1 |
| Shughni | sgh (a) | 0 | 1 | 1 | 1 | 1 | 0 | 1 | 1 | 1 | 0 | 1 | 1 | 1 | 1 | 1 | 1 |
| Torwali | trw | 0 | 1 | 1 | 1 | 0 | 0 | 0 | 0 | 1 | 0 | 1 | 0 | 1 | 1 | ? | 1 |
| Ushojo | ush | 0 | 1 | 1 | 1 | 0 | 0 | 0 | 0 | 1 | 0 | 1 | 0 | 1 | 1 | 1 | 1 |
| Uzbek | uzs | 0 | 1 | 1 | 1 | 0 | 0 | 1 | 1 | 1 | 0 | 1 | 1 | 0 | 1 | 1 | 1 |
| Waigali | wbk | 0 | 1 | 1 | 1 | ? | 0 | 0 | 0 | 1 | 0 | 1 | 1 | 1 | 1 | 1 | 1 |
| Wakhi A | wbl (a) | 0 | 1 | 1 | 0 | 1 | 0 | 1 | 0 | 1 | 0 | 1 | 1 | 0 | 1 | 1 | 1 |
| Wakhi P | wbl (p) | 0 | 1 | 1 | 0 | 1 | 0 | 0 | 1 | 1 | 0 | 1 | 0 | 1 | 1 | ? | 1 |
| Yidgha | ydg | 0 | 1 | 1 | 0 | 1 | 0 | 0 | 1 | 1 | 0 | 1 | 0 | 1 | 1 | 1 | 1 |
| Urdu | urd | 0 | 1 | 1 | 1 | 0 | 0 | 1 | 0 | 1 | 0 | 1 | 0 | 1 | 1 | 1 | 1 |
| Dari Standard | prs | 0 | 1 | 1 | 1 | 1 | 0 | 1 | 0 | 0 | 1 | 1 | 1 | 0 | 1 | 0 | 0 |

***Clause structure (16 features)***

| Variety | Code | CS01a | CS01b | CS02a | CS02b | CS03a | CS03b | CS03c | CS04a | CS04b | CS05 | CS06a | CS06b | CS06c | CS07 | CS08 | CS09 |
| --- | --- | --- | --- | --- | --- | --- | --- | --- | --- | --- | --- | --- | --- | --- | --- | --- | --- |
| Ashkun | ask | 1 | 0 | 0 | 1 | 0 | 0 | 1 | 1 | 1 | ? | 1 | ? | ? | 0 | ? | 1 |
| Balti | bft | 1 | 0 | 0 | 0 | 0 | 0 | 0 | 0 | 0 | 0 | 1 | 1 | 0 | 0 | 0 | 0 |
| Bateri | btv | 0 | 0 | 0 | 1 | 0 | 1 | 1 | 1 | ? | 1 | 1 | 0 | 0 | 0 | ? | 1 |
| Brokskat | bkk | 1 | 0 | 0 | 0 | 0 | ? | 0 | 0 | 1 | 1 | 1 | 0 | 0 | 0 | ? | 1 |
| Burushaski H | bsk (h) | 1 | 0 | 1 | 1 | 0 | 0 | 1 | 1 | 1 | 0 | 1 | ? | ? | 1 | 1 | 1 |
| Burushaski N | bsk (n) | 1 | 0 | 1 | 1 | 0 | 0 | 1 | 1 | 1 | 0 | 1 | 0 | 0 | 1 | 1 | 1 |
| Dameli | dml | 1 | 0 | 1 | 0 | 0 | 0 | 1 | 0 | 1 | 1 | 1 | ? | ? | 0 | 1 | 1 |
| Darwazi | prs (d) | 0 | 1 | 1 | 0 | 0 | ? | 1 | 0 | 1 | 1 | 1 | 0 | 0 | 0 | 1 | 0 |
| Gawarbati A | gwt (a) | 1 | 1 | 1 | 0 | 0 | 0 | 1 | 0 | 1 | 1 | 1 | ? | ? | 0 | 1 | 1 |
| Gawarbati P | gwt (p) | 1 | 1 | 1 | 0 | 0 | 0 | 1 | 0 | 1 | 0 | 1 | 0 | 0 | 0 | 1 | 1 |
| Gawri | gwc | 1 | 0 | 0 | 1 | 1 | 0 | 1 | 1 | 1 | 1 | 1 | 0 | 0 | 0 | ? | 1 |
| Gojri A | gju (a) | 1 | 1 | 0 | 1 | 0 | 0 | 1 | 1 | 1 | 1 | 1 | 1 | 0 | 0 | 1 | 1 |
| Gojri P | gju (p) | 1 | 1 | 0 | 1 | 1 | 0 | 1 | 1 | ? | 1 | 1 | 1 | 0 | 0 | ? | 1 |
| Hindko | hno | 1 | 1 | 0 | 1 | 0 | 0 | 1 | 1 | 1 | 1 | 1 | 1 | 0 | 0 | 1 | 1 |
| Indus Kohistani | mvy | 1 | 0 | 0 | 0 | 0 | 0 | 1 | 0 | 1 | 0 | 1 | 0 | 0 | 0 | ? | 1 |
| Ishkashimi | isk | 0 | 1 | 0 | 0 | 1 | 1 | 1 | 0 | 1 | 0 | 1 | 0 | 0 | 0 | 1 | 0 |
| Kalasha | kls | 0 | 1 | 1 | 0 | 1 | 1 | 1 | 0 | 1 | 1 | 1 | 1 | 0 | 0 | 1 | ? |
| Kalkoti | xka | 1 | 0 | 0 | 0 | 1 | 0 | 0 | 0 | 1 | 0 | 1 | 0 | 0 | 0 | 0 | 1 |
| Kamviri | xvi | 1 | 0 | 0 | 1 | 0 | ? | 1 | 1 | 1 | 0 | 1 | 1 | ? | 0 | 1 | 1 |
| Kashmiri I | kas (i) | 1 | 0 | 1 | 1 | 0 | 0 | 1 | 1 | 1 | 1 | 1 | 1 | 0 | 1 | 1 | 1 |
| Kashmiri P | kas (p) | 1 | 1 | 1 | 1 | 0 | 0 | 1 | 1 | 1 | 0 | 1 | ? | 0 | 1 | 1 | 1 |
| Kati E | bsh (e) | 1 | 0 | 0 | 1 | 0 | ? | 1 | 1 | 1 | 1 | 1 | 1 | ? | 0 | 1 | 1 |
| Kati W | bsh (w) | 1 | 0 | 0 | 1 | 0 | 0 | 1 | 1 | 1 | 1 | 1 | 1 | ? | 0 | 1 | 1 |
| Khowar | khw | 0 | 1 | 1 | 0 | 1 | 1 | 1 | 0 | 1 | 1 | 1 | 1 | 0 | 0 | 1 | 1 |
| Koh Shina | plk | 1 | 0 | 1 | 0 | 0 | ? | 1 | 0 | 1 | 1 | 1 | 0 | 0 | 0 | 1 | 1 |
| Kundal Shahi | shd | 1 | 1 | 0 | 0 | 0 | 0 | 1 | 0 | 1 | ? | 1 | 1 | 0 | 0 | ? | 1 |
| Kyrgyz | kir | 0 | 1 | 1 | 0 | 1 | 0 | ? | 0 | 1 | 0 | 1 | ? | 0 | 0 | 1 | 0 |
| Ladakhi | lbj | 1 | 1 | 0 | 0 | 0 | 0 | 0 | 0 | 0 | 0 | 1 | ? | 0 | 0 | 0 | 0 |
| Munji | mnj | 1 | 1 | 1 | 0 | 1 | 0 | 1 | 0 | 1 | 0 | ? | 0 | 0 | 0 | 1 | 0 |
| Pahari-Pothwari | phr | 1 | 1 | 0 | 1 | 0 | 0 | 1 | 1 | 1 | 1 | 1 | 1 | 0 | 0 | ? | 1 |
| Palula | phl | 1 | 0 | 0 | 1 | 1 | 1 | 1 | 1 | 1 | 1 | 1 | 0 | 0 | 0 | 1 | 1 |
| Parachi | prc | 0 | 1 | 0 | 0 | 0 | 0 | 1 | 0 | 1 | 0 | 1 | 1 | 0 | 0 | 1 | 0 |
| Pashai Alasai | psh (ai) | 0 | 0 | 1 | 1 | 0 | 0 | 1 | 1 | 1 | 0 | 1 | 0 | 0 | 0 | 1 | 1 |
| Pashai Alingar | psi (ar) | 1 | 0 | 1 | 1 | 0 | 0 | 1 | 1 | 1 | 1 | 1 | 0 | 0 | 1 | 1 | 1 |
| Pashai Alishang | glh (ag) | 0 | 0 | 0 | 1 | 0 | 0 | 1 | 1 | 1 | 1 | 1 | 0 | 0 | 0 | 1 | 1 |
| Pashai Amla | psi (am) | 1 | 0 | 1 | 1 | 0 | 0 | 1 | 1 | 1 | 1 | 1 | 0 | 0 | 1 | 1 | 1 |
| Pashai Aret | aee (at) | 1 | 0 | ? | ? | 0 | 0 | 1 | 1 | 1 | 1 | ? | ? | ? | ? | 1 | 1 |
| Pashai Chalas | aee (ch) | 1 | 0 | 1 | 1 | 0 | 0 | 1 | 1 | 1 | 1 | 1 | 0 | 0 | 1 | 1 | 1 |
| Pashai Korangal | aee (kg) | 1 | 0 | 1 | 0 | 0 | 0 | 1 | 0 | 1 | 0 | 1 | ? | 0 | 0 | 1 | 1 |
| Pashai Sanjan | glh (sn) | 0 | 1 | 1 | 1 | 0 | ? | ? | 1 | 1 | 1 | 1 | 0 | 0 | 0 | 1 | ? |
| Pashai Shemal | aee (sh) | 1 | 0 | 1 | 0 | ? | 0 | 0 | 0 | 1 | 1 | 1 | 0 | 0 | 0 | 1 | 1 |
| Pashto A | pbu (a) | 1 | 0 | 0 | 1 | 0 | 0 | 1 | 1 | 1 | 1 | 1 | 0 | 0 | 0 | 1 | 1 |
| Pashto I | pbu (i) | 1 | 0 | 0 | 1 | 0 | 0 | 1 | 1 | 1 | 1 | 1 | 0 | 0 | 0 | 1 | 1 |
| Pashto P | pbu (p) | 1 | 0 | 0 | 1 | 0 | 0 | 1 | 1 | 1 | 0 | 1 | 0 | 0 | 0 | 1 | 1 |
| Prasun | prn | 0 | 1 | 1 | 0 | 0 | 0 | 1 | 0 | 1 | 0 | 1 | ? | ? | 0 | 1 | 0 |
| Purik | prx | 1 | 0 | 0 | 0 | 0 | 0 | 0 | 0 | 0 | 0 | 1 | ? | 0 | 0 | 0 | 0 |
| Rushani | sgh (r) | 0 | 0 | 1 | 0 | 1 | ? | ? | 0 | 1 | 1 | 1 | 0 | 0 | 0 | 1 | 0 |
| Sanglechi | sgy | 0 | 1 | 1 | 0 | 1 | 0 | 1 | 0 | 1 | 0 | 1 | 0 | 0 | 0 | 1 | 0 |
| Sawi | sdg | 1 | 0 | 0 | 1 | 0 | 0 | 1 | 1 | 1 | 1 | 1 | 0 | 0 | 0 | ? | 1 |
| Shina Gilgit | scl (p) | 1 | 0 | 1 | 0 | 0 | 1 | 1 | 0 | 1 | 0 | 1 | 0 | 0 | 0 | 1 | 1 |
| Shina Gurez | scl (i) | 1 | 1 | 1 | 0 | 0 | 1 | 1 | 0 | 1 | 0 | 1 | 0 | 0 | 0 | 1 | 1 |
| Shughni | sgh (a) | 0 | 1 | 0 | 0 | 1 | 1 | 1 | 0 | 1 | 0 | 1 | 0 | 0 | 0 | 1 | 0 |
| Torwali | trw | 1 | 0 | 0 | 1 | 0 | 0 | 1 | 1 | 1 | 0 | 1 | 0 | 0 | 0 | 0 | 1 |
| Ushojo | ush | 1 | 0 | 0 | 0 | 0 | 0 | 1 | 0 | 1 | 1 | 1 | 0 | 0 | 0 | ? | 1 |
| Uzbek | uzs | 0 | 1 | 1 | 0 | 1 | 1 | 1 | 0 | 1 | 0 | 1 | 0 | 0 | 0 | 1 | 0 |
| Waigali | wbk | 1 | 0 | 1 | 0 | 0 | 0 | 1 | 0 | 1 | ? | ? | ? | ? | 0 | 1 | 0 |
| Wakhi A | wbl (a) | 0 | 1 | 0 | 0 | 1 | 1 | 1 | 0 | 1 | 0 | 1 | ? | 0 | 0 | 1 | 0 |
| Wakhi P | wbl (p) | 1 | 0 | 0 | 0 | 1 | 1 | 1 | 0 | 1 | 0 | 1 | 0 | 0 | 0 | ? | 0 |
| Yidgha | ydg | 1 | 1 | 1 | 0 | 1 | ? | ? | 0 | 1 | 1 | 1 | ? | ? | 0 | 1 | 0 |
| Urdu | urd | 1 | 1 | 0 | 1 | 0 | 0 | 1 | 1 | 1 | 1 | 1 | 1 | 0 | 0 | 1 | 1 |
| Dari Standard | prs | 0 | 1 | 1 | 0 | 1 | ? | 1 | 0 | 1 | 1 | 1 | 0 | 0 | 0 | 1 | 0 |

***Lexico-semantics (16 features)***

| Variety | Code | LX01a | LX01b | LX01c | LX01d | LX01e | LX02a | LX02b | LX03a | LX03b | LX04a | LX04b | LX05 | LX06a | LX06b | LX07 | LX08 |
| --- | --- | --- | --- | --- | --- | --- | --- | --- | --- | --- | --- | --- | --- | --- | --- | --- | --- |
| Ashkun | ask | 1 | 0 | 1 | 0 | 0 | 0 | 1 | 0 | 1 | 1 | 1 | 0 | 1 | 0 | 0 | 1 |
| Balti | bft | 1 | 0 | 1 | 0 | 0 | 0 | 1 | 1 | 1 | 1 | 0 | 0 | 1 | 0 | 0 | 0 |
| Bateri | btv | 0 | 0 | 0 | 0 | 0 | 0 | 1 | 0 | 0 | 1 | 0 | 0 | 1 | 0 | 1 | 0 |
| Brokskat | bkk | 1 | 0 | 1 | 0 | 0 | 0 | 1 | 0 | 1 | 0 | 0 | 0 | 1 | 0 | 0 | 1 |
| Burushaski H | bsk (h) | 1 | 0 | 0 | 0 | 1 | 0 | 1 | 1 | 1 | 1 | 0 | 0 | 0 | 0 | 0 | 0 |
| Burushaski N | bsk (n) | 1 | 0 | 1 | 0 | 1 | 0 | 1 | 1 | 1 | 1 | 0 | 0 | 0 | 0 | 0 | 0 |
| Dameli | dml | 1 | 0 | 0 | 0 | 0 | 0 | 1 | 0 | 1 | 1 | 1 | 0 | 1 | 0 | 1 | 1 |
| Darwazi | prs (d) | 0 | 0 | 0 | 0 | 0 | 1 | 0 | 0 | 1 | 0 | 0 | 0 | 1 | 1 | 0 | 0 |
| Gawarbati A | gwt (a) | ? | ? | ? | ? | 0 | 0 | 1 | 0 | 1 | 1 | 1 | ? | 1 | 1 | 1 | 0 |
| Gawarbati P | gwt (p) | 1 | 0 | 0 | 0 | 0 | 0 | 1 | 0 | 1 | 1 | 1 | 0 | 1 | 0 | 1 | 0 |
| Gawri | gwc | 1 | 0 | 0 | 0 | 0 | 0 | 1 | 0 | 0 | 1 | 1 | 1 | 1 | 1 | 1 | 1 |
| Gojri A | gju (a) | 0 | 0 | 0 | 0 | 0 | 1 | 0 | 0 | 0 | 1 | 1 | 1 | 1 | 1 | 0 | 1 |
| Gojri P | gju (p) | 0 | 0 | 0 | 0 | 0 | 1 | 0 | 0 | 0 | 1 | 1 | 1 | 1 | 0 | 1 | 0 |
| Hindko | hno | 0 | 0 | 0 | 0 | 0 | 1 | 0 | 0 | 0 | 1 | 1 | 1 | 1 | 1 | 1 | 0 |
| Indus Kohistani | mvy | 0 | 0 | 0 | 0 | 0 | 0 | 1 | 0 | 0 | 1 | 1 | 0 | 1 | 0 | 1 | 1 |
| Ishkashimi | isk | 0 | 0 | 0 | 0 | 0 | 1 | 0 | 0 | 1 | 0 | 0 | 0 | 0 | 0 | 0 | 0 |
| Kalasha | kls | 1 | 0 | 0 | 1 | 0 | 0 | 1 | 1 | 1 | 1 | 0 | 0 | 1 | 1 | 1 | 0 |
| Kalkoti | xka | 1 | 0 | 0 | 0 | 0 | 0 | 1 | 0 | 0 | 1 | 1 | 1 | 1 | 1 | 1 | 0 |
| Kamviri | xvi | 1 | 0 | 1 | 1 | 0 | 0 | 1 | 0 | 1 | 1 | 1 | 0 | ? | ? | 0 | 0 |
| Kashmiri I | kas (i) | 0 | 0 | 0 | 0 | 0 | 1 | 0 | 0 | 0 | 1 | 0 | 0 | 0 | 0 | 1 | 1 |
| Kashmiri P | kas (p) | 0 | 0 | 0 | 0 | 0 | 1 | 0 | 0 | 0 | 1 | 0 | ? | 1 | 1 | 1 | 0 |
| Kati E | bsh (e) | 1 | 0 | 1 | 1 | 0 | 0 | 1 | 0 | 1 | 1 | 1 | ? | ? | ? | 0 | 0 |
| Kati W | bsh (w) | 1 | 0 | 0 | 1 | 0 | 0 | 1 | 0 | 1 | 1 | 1 | 0 | 1 | 0 | 0 | 1 |
| Khowar | khw | 0 | 1 | 0 | 1 | 0 | 0 | 1 | 1 | 1 | 1 | 1 | 0 | 0 | 0 | 0 | 0 |
| Koh Shina | plk | 0 | 0 | 0 | 0 | 0 | 0 | 1 | 0 | 1 | 1 | 1 | 0 | 1 | 0 | 1 | 1 |
| Kundal Shahi | shd | 0 | 0 | 0 | 0 | 0 | 1 | 0 | 0 | ? | 1 | 1 | 1 | 1 | 1 | 1 | 0 |
| Kyrgyz | kir | 0 | 0 | 0 | 1 | 0 | 1 | 0 | 1 | 1 | 0 | 0 | 0 | 1 | 1 | 0 | 0 |
| Ladakhi | lbj | 1 | 0 | 0 | 0 | 0 | 0 | 1 | 1 | 1 | 0 | 0 | 0 | 1 | 0 | 0 | 0 |
| Munji | mnj | 0 | 1 | 0 | 1 | 0 | 0 | 0 | 1 | 1 | 0 | 0 | 0 | 1 | 0 | 0 | 0 |
| Pahari-Pothwari | phr | 0 | 0 | 0 | 0 | 0 | ? | ? | 0 | ? | 1 | 1 | 1 | 1 | 1 | 0 | 0 |
| Palula | phl | 1 | 0 | 1 | 0 | 0 | 0 | 1 | 0 | 1 | 1 | 1 | 1 | 1 | 1 | 1 | 1 |
| Parachi | prc | 0 | 0 | 0 | 0 | 0 | 1 | 0 | 0 | 1 | 1 | 1 | 0 | 0 | 0 | 0 | 0 |
| Pashai Alasai | psh (ai) | 0 | 0 | 0 | 1 | 0 | 1 | 0 | 0 | 1 | 1 | 1 | 1 | 1 | 0 | 0 | 0 |
| Pashai Alingar | psi (ar) | 0 | 0 | 0 | 1 | 0 | 0 | 1 | 0 | 1 | 1 | 1 | 0 | 1 | 0 | 0 | 1 |
| Pashai Alishang | glh (ag) | 0 | 0 | 0 | 0 | 0 | 0 | 1 | 0 | 1 | ? | ? | 0 | 1 | 0 | 1 | 0 |
| Pashai Amla | psi (am) | 0 | 0 | 0 | 1 | 0 | 0 | 1 | 0 | 1 | 1 | 1 | 0 | 1 | 0 | 0 | 1 |
| Pashai Aret | aee (at) | 0 | 0 | 0 | 1 | 0 | 0 | 1 | 0 | 1 | 1 | 1 | ? | 1 | 0 | 0 | 1 |
| Pashai Chalas | aee (ch) | 0 | 0 | 1 | 0 | 0 | 0 | 1 | 0 | 1 | 1 | 1 | 0 | 1 | 0 | 0 | 1 |
| Pashai Korangal | aee (kg) | 0 | 0 | 1 | 1 | 0 | 0 | 1 | 0 | 0 | 1 | 1 | 0 | 0 | 0 | 1 | 1 |
| Pashai Sanjan | glh (sn) | 0 | 0 | 0 | 0 | 0 | 1 | 0 | 0 | 1 | 1 | 1 | 0 | 1 | 0 | 0 | 0 |
| Pashai Shemal | aee (sh) | ? | ? | ? | ? | 0 | 0 | 1 | 0 | 1 | 1 | 1 | ? | 1 | 0 | 0 | 0 |
| Pashto A | pbu (a) | 0 | 0 | 0 | 0 | 0 | 1 | 0 | 0 | 0 | 0 | 0 | 0 | 1 | 0 | 0 | ? |
| Pashto I | pbu (i) | 0 | 0 | 0 | 0 | 0 | 1 | 0 | 0 | 0 | 1 | 1 | 0 | 1 | 0 | 1 | 1 |
| Pashto P | pbu (p) | 0 | 0 | 0 | 0 | 0 | 1 | 0 | 0 | 0 | 1 | 1 | 0 | 1 | 0 | 1 | 1 |
| Prasun | prn | 1 | 0 | 1 | 1 | 0 | 0 | 1 | 0 | 0 | 1 | 0 | 0 | 1 | 0 | 0 | 1 |
| Purik | prx | 0 | 0 | 1 | 0 | 0 | 0 | 1 | 1 | 1 | 1 | 0 | 0 | 1 | 0 | 0 | 0 |
| Rushani | sgh (r) | 0 | 0 | 0 | 1 | 0 | 1 | 0 | 0 | 1 | 0 | 0 | 0 | 1 | 0 | 0 | ? |
| Sanglechi | sgy | 0 | 0 | 0 | 0 | 0 | 1 | 0 | 0 | 1 | 1 | 0 | 0 | 1 | 1 | 0 | 0 |
| Sawi | sdg | 0 | 0 | 0 | 0 | 0 | 0 | 1 | 0 | 0 | 1 | 1 | 0 | 1 | 0 | 0 | 1 |
| Shina Gilgit | scl (p) | 1 | 0 | 1 | 0 | 0 | 0 | 1 | 0 | 1 | 0 | 0 | 0 | 1 | 0 | 0 | 1 |
| Shina Gurez | scl (i) | 0 | 0 | 0 | 0 | 0 | 0 | 1 | 0 | 1 | 1 | 1 | 0 | 1 | 0 | 0 | 0 |
| Shughni | sgh (a) | 0 | 0 | 0 | 0 | 0 | 1 | 0 | 1 | 1 | 0 | 0 | 0 | 1 | 0 | 0 | ? |
| Torwali | trw | 1 | 0 | 0 | 0 | 0 | 0 | 1 | 0 | 0 | 1 | 1 | 1 | 1 | 0 | 1 | 0 |
| Ushojo | ush | 0 | 0 | 0 | 0 | 0 | 0 | 1 | 0 | 0 | 1 | 0 | 1 | 0 | 0 | 0 | 0 |
| Uzbek | uzs | 0 | 0 | 0 | 0 | 0 | 1 | 0 | 1 | 1 | 1 | 0 | 0 | 0 | 0 | 0 | 1 |
| Waigali | wbk | 1 | 0 | 1 | 0 | 0 | 0 | 1 | 0 | 1 | 1 | 1 | 0 | 1 | 1 | 0 | 0 |
| Wakhi A | wbl (a) | 0 | 0 | 0 | 0 | 0 | 0 | 1 | 1 | 1 | 1 | 0 | 0 | 1 | 1 | 0 | 0 |
| Wakhi P | wbl (p) | 0 | 1 | 0 | 1 | 0 | 0 | 1 | 1 | 1 | 1 | 0 | 0 | 0 | 0 | 1 | 0 |
| Yidgha | ydg | 0 | 1 | 0 | 1 | 0 | 0 | 1 | 1 | 1 | 1 | 1 | 0 | 1 | 0 | 0 | 0 |
| Urdu | urd | 0 | 0 | 0 | 0 | 0 | 1 | 0 | 0 | 0 | 0 | 0 | 1 | 1 | 1 | 0 | 0 |
| Dari Standard | prs | 0 | 0 | 0 | 0 | 0 | 1 | 0 | 0 | 1 | 0 | 0 | 0 | 0 | 0 | 0 | 0 |
